# Supplementary material for: New rat model of spinal cord infarction with long-lasting functional disabilities generated by intraspinal injection of endothelin-1
Source: HighWire-hosted journal article supplement (doi:10.1136/svn-2023-002962), 2024-06-21
Supplement: svn-2023-002962supp001_data_supplement.pdf [file svn-2023-002962supp001_data_supplement.pdf]

## Aortic clamp model

- Previous models have not reported long-term survival due to visceral ischaemic injury.
- The anatomical diversity of the spinal cord vasculature determines whether a spinal cord infarction occurs.

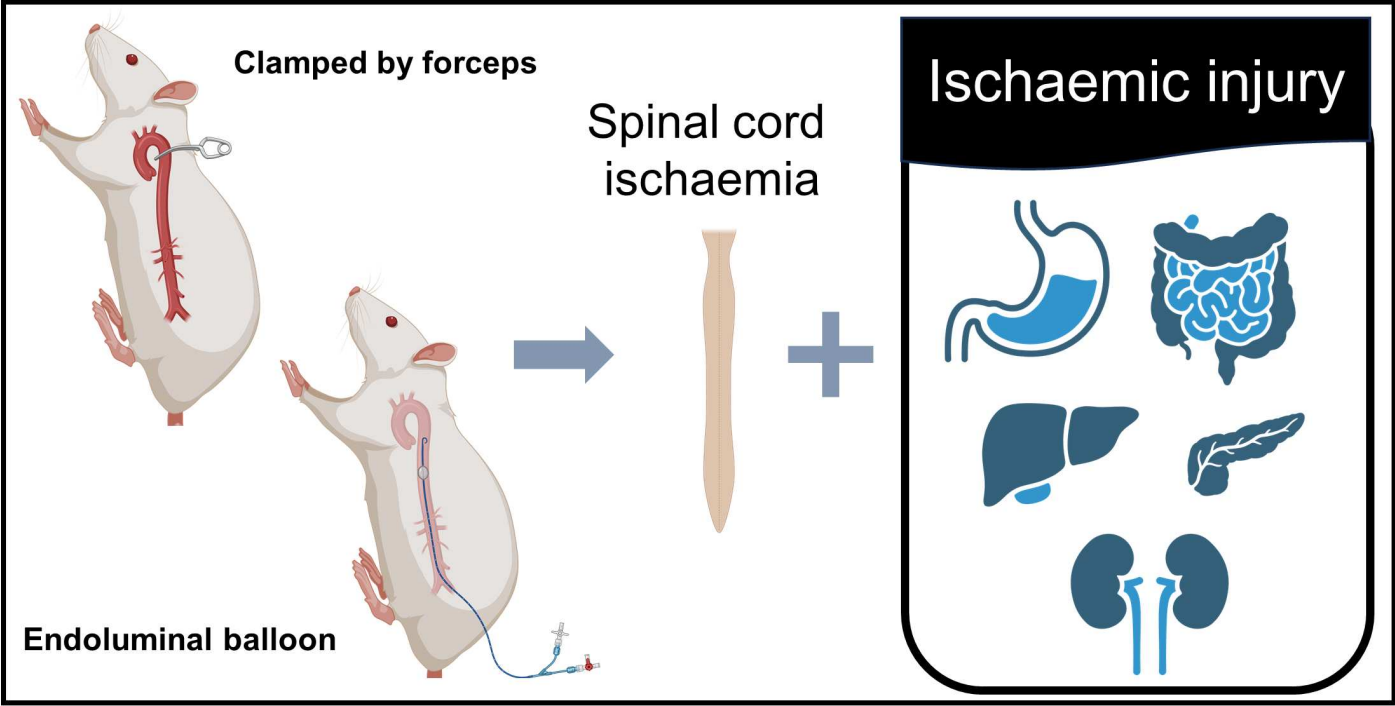

## Endothelin-1 injection model

- Our technique induces spinal cord infarction at the targeted site.
- The results induced by this methodology are not influenced by the course variations in the spinal cord arteries.

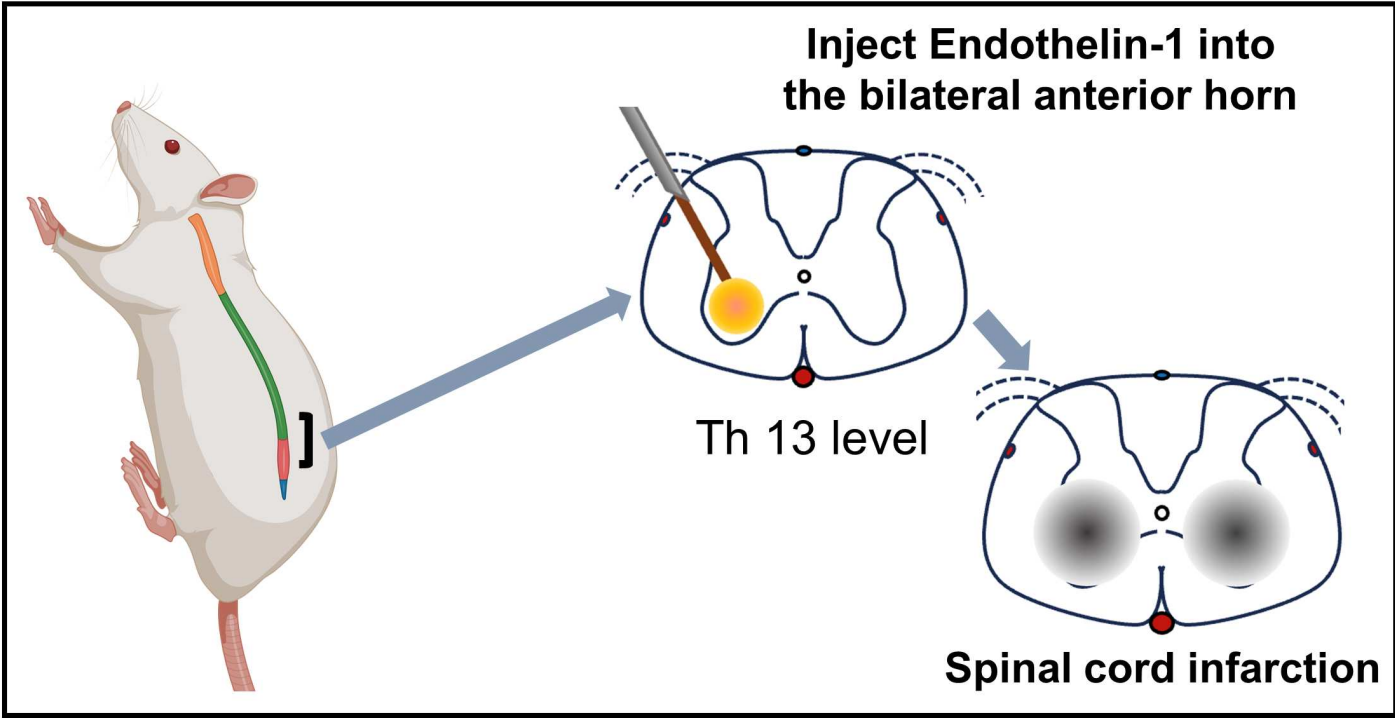

Supplementary figure 1
