# Supplementary material for: New rat model of spinal cord infarction with long-lasting functional disabilities generated by intraspinal injection of endothelin-1
Source: HighWire-hosted journal article supplement (doi:10.1136/svn-2023-002962), 2024-06-21
Supplement: svn-2023-002962supp003_data_supplement.pdf [file svn-2023-002962supp003_data_supplement.pdf]

A

| Category | Type of foot misplacement | Details                                                                                                                                             |
|----------|---------------------------|-----------------------------------------------------------------------------------------------------------------------------------------------------|
| 0        | Total miss                | the limb did not touch the rung (missed a rung) and resulted in a fall                                                                              |
| 1        | Deep slip                 | the limb slipped off a rung and a fall occurred                                                                                                     |
| 2        | Slight slip               | the limb slipped off a rung during weight bearing, but a fall did not occur and the rodent interrupts walking                                       |
| 3        | Replacement               | before weight bearing the limb on a rung, the rodent quickly lifted and placed the foot on another rung                                             |
| 4        | Correction                | the limb is clearly about to be placed on a rung, but the rodent quickly changes the feet placement to another rung without touching the first rung |
| 5        | Partial placement         | the limb is placed on the rung either using the wrist or digits for the forelimb or heel or toes for the hindlimb                                   |
| 6        | Correct placement         | the full body weight bearing is applied on a rung with the midportion of the foot                                                                   |

- Score according to the above system and compare total scores (ET-1 group, intact, n = 3 each)

B

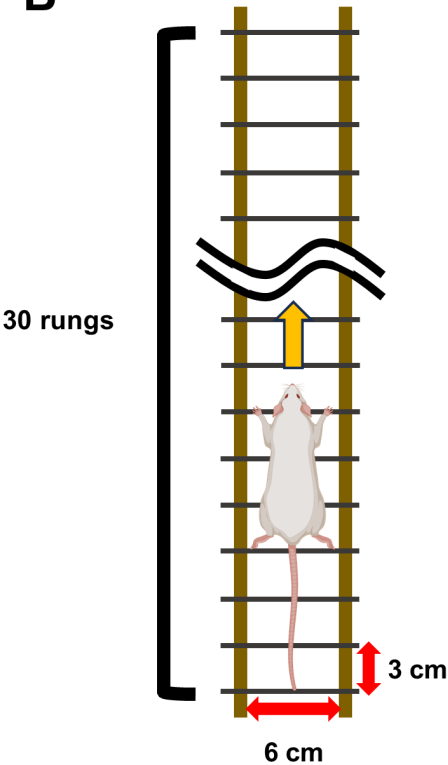

C

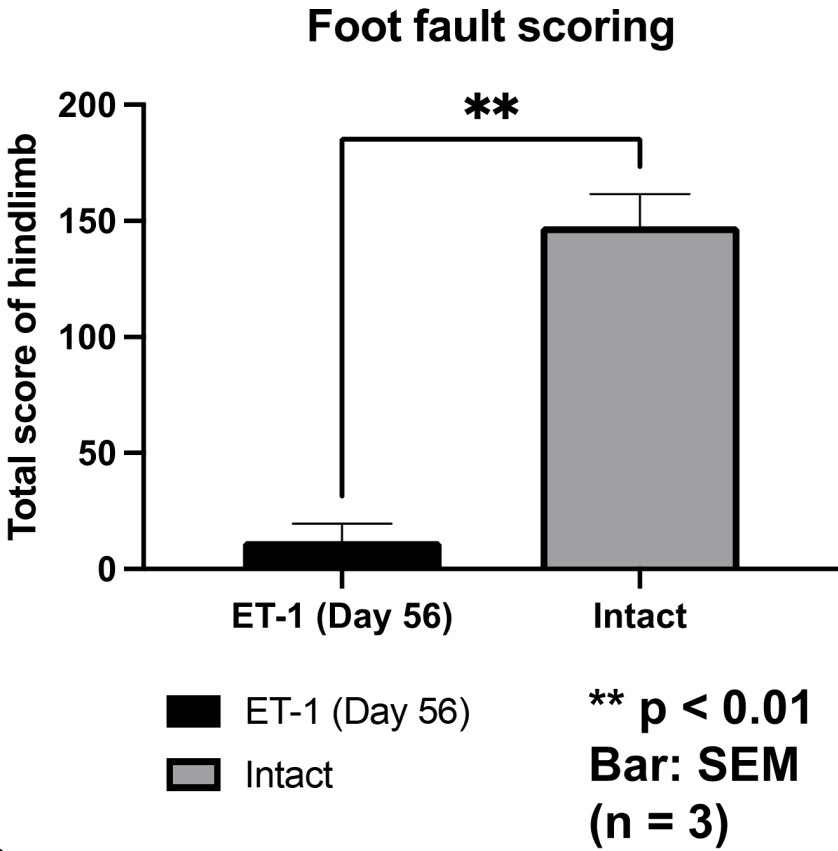

Supplementary figure 3
