# Supplementary material for: New rat model of spinal cord infarction with long-lasting functional disabilities generated by intraspinal injection of endothelin-1
Source: HighWire-hosted journal article supplement (doi:10.1136/svn-2023-002962), 2024-06-21
Supplement: svn-2023-002962supp006_data_supplement.pdf [file svn-2023-002962supp006_data_supplement.pdf]

A Representative Western Blots

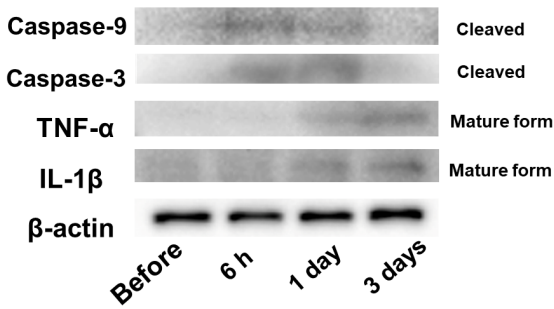

B Cleaved Caspase-9 / β-actin

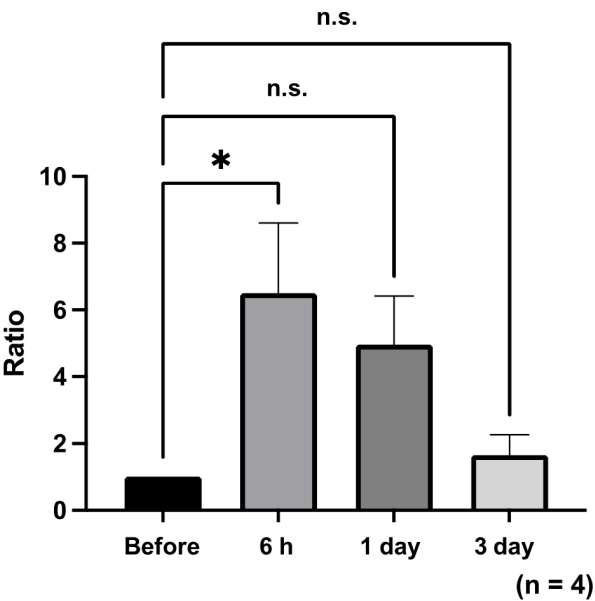

C Cleaved Caspase-3 / β-actin

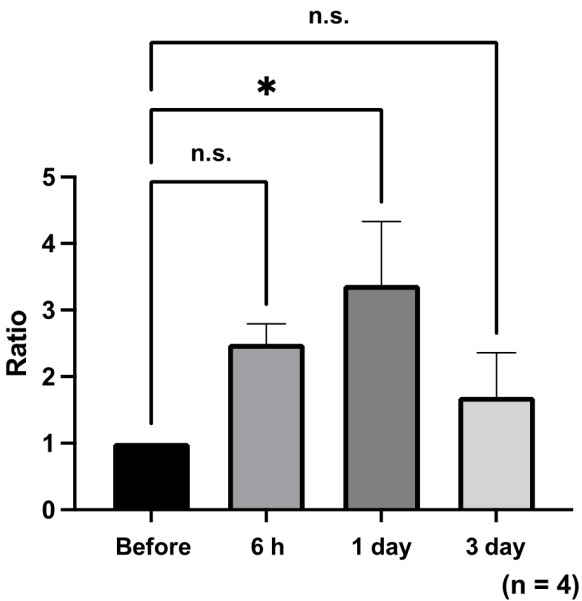

D TNF-α / β-actin

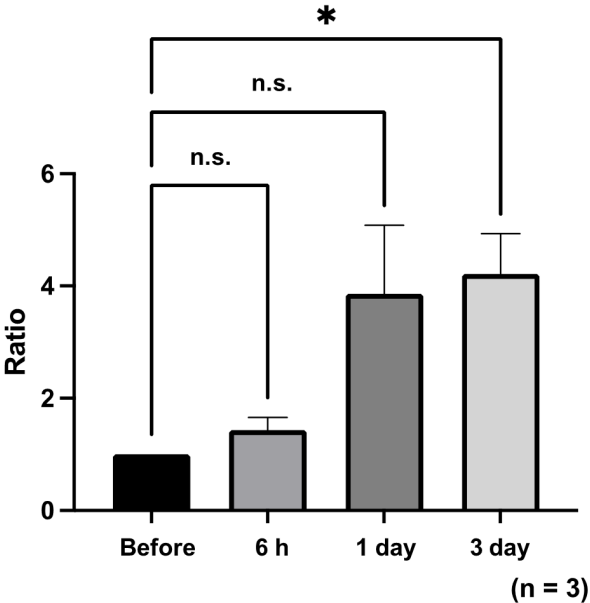

E IL-1β / β-actin

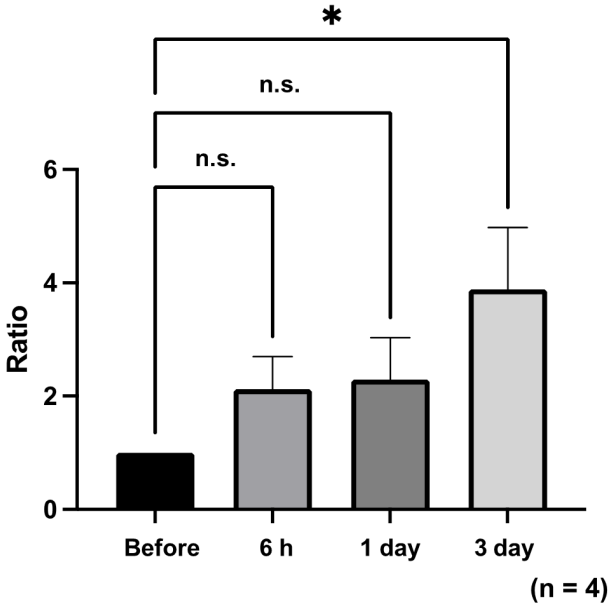

\* p < 0.05  
n.s. not significance  
Bar: SEM

Statistical analysis was performed for comparison of Before and other time points.

Supplementary figure 6
