# Supplementary figures and images for: New rat model of spinal cord infarction with long-lasting functional disabilities generated by intraspinal injection of endothelin-1
Source: HighWire-hosted journal article supplement (doi:10.1136/svn-2023-002962), 2024-06-21

# Experiment Schedule

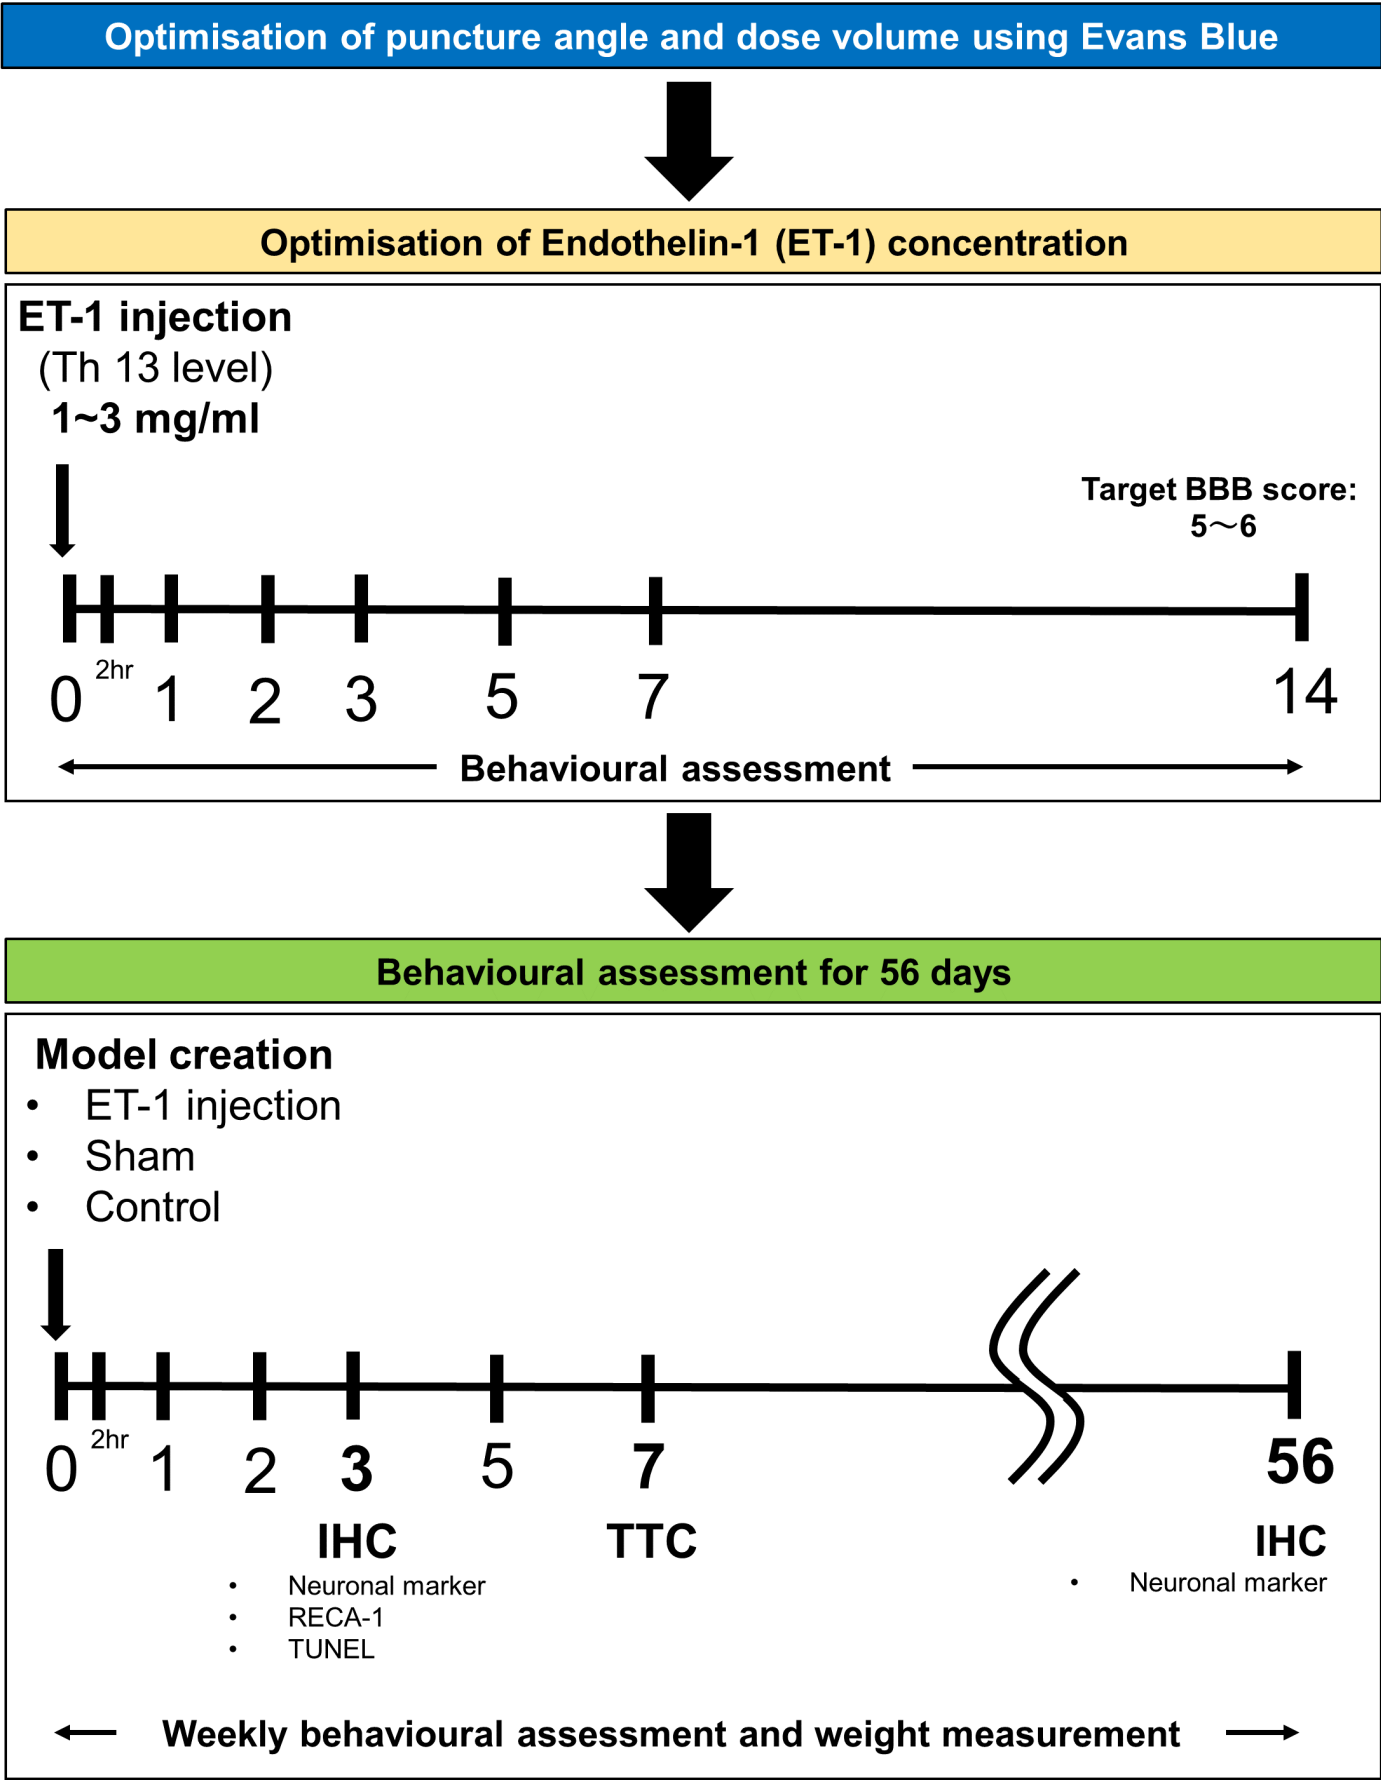

Supplementary figure 2

Supplement: svn-2023-002962supp002_data_supplement.pdf [file svn-2023-002962supp002_data_supplement.pdf]

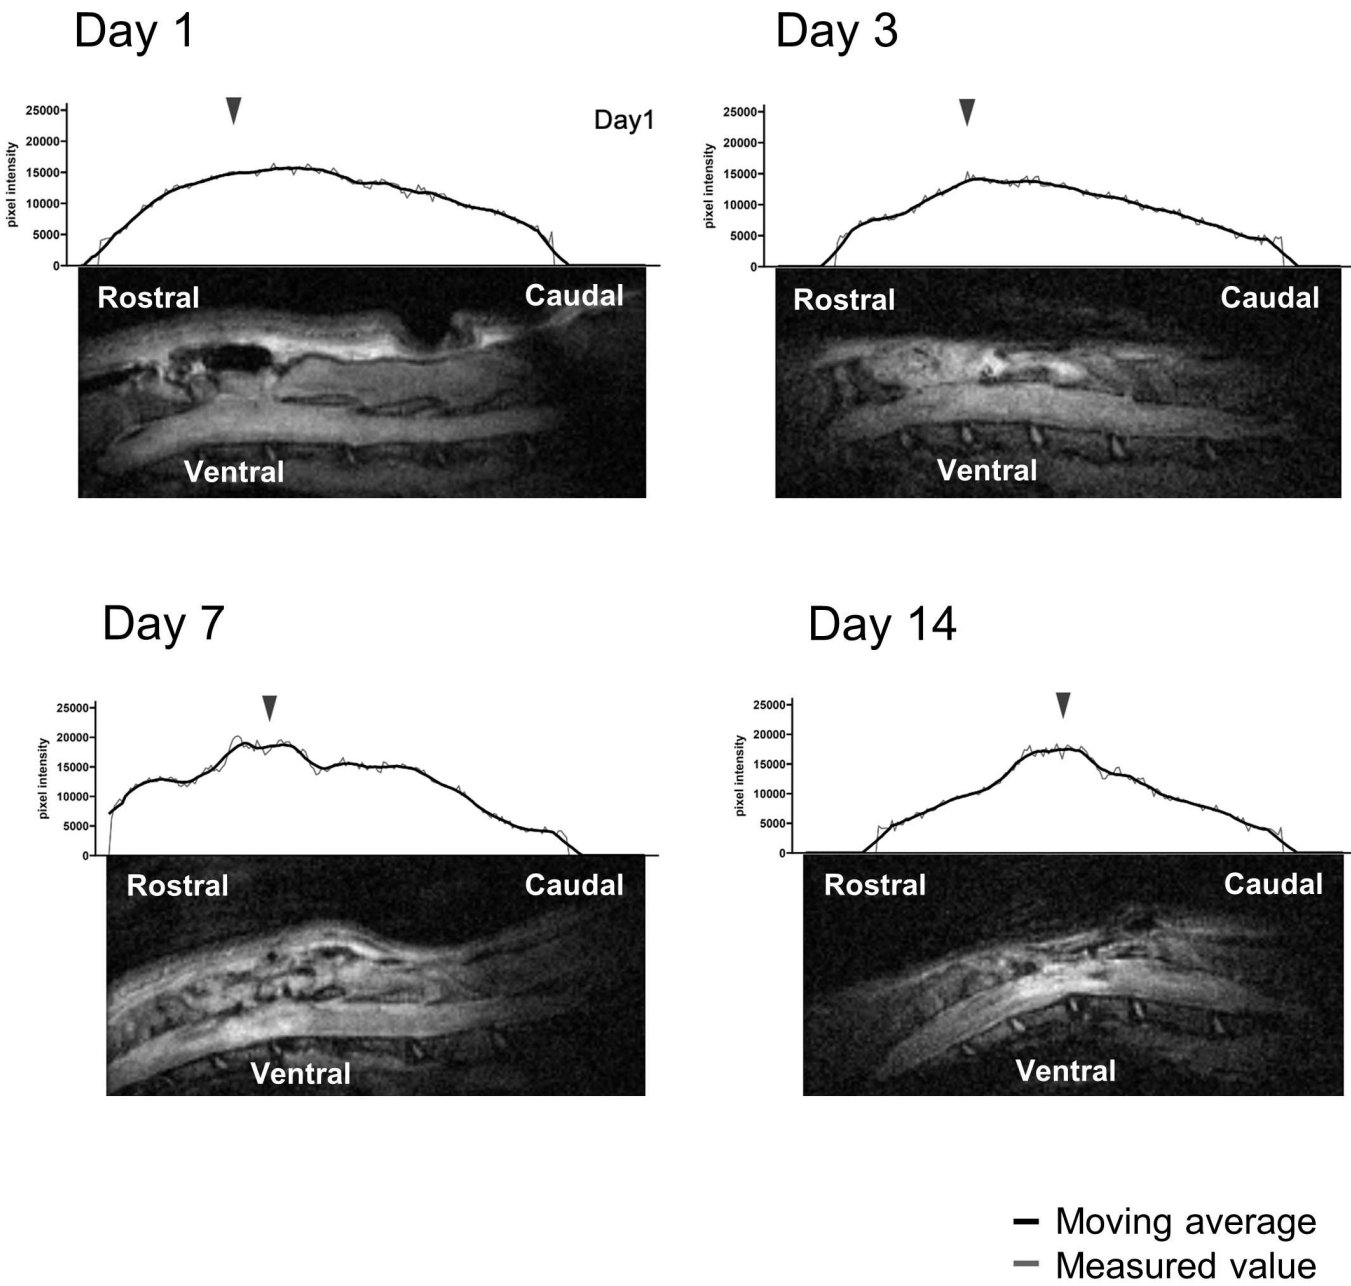

Supplementary figure 4

Supplement: svn-2023-002962supp004_data_supplement.pdf [file svn-2023-002962supp004_data_supplement.pdf]

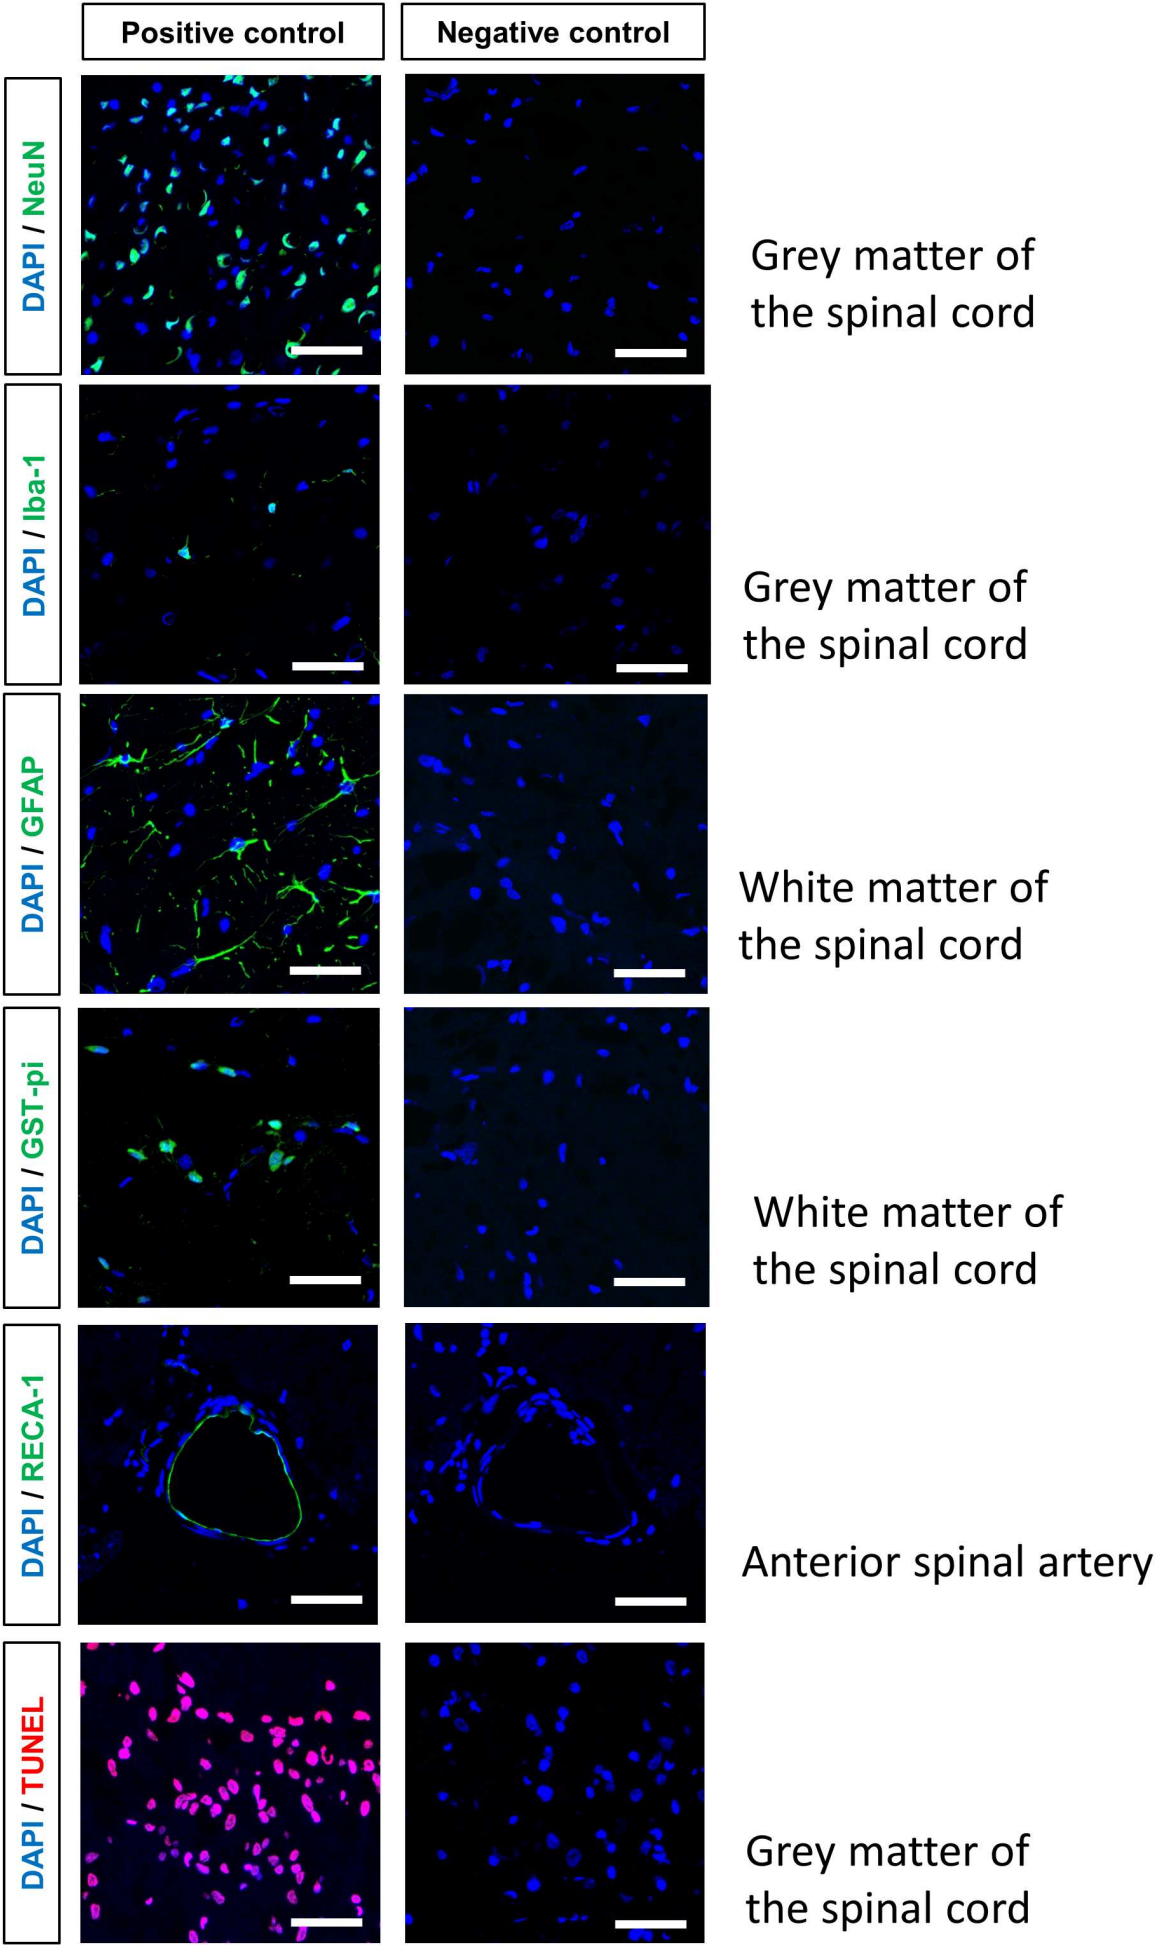

Supplementary figure 5

Bar = 50 μm

Supplement: svn-2023-002962supp005_data_supplement.pdf [file svn-2023-002962supp005_data_supplement.pdf]
